# Supplementary material for: Universal protection against influenza viruses by multi-subtype neuraminidase and M2 ectodomain virus-like particle
Source: PubMed Central journal article supplement (PMC9409530; doi:10.1371/journal.ppat.1010755), 2022-08-25
Supplement: ppat.1010755.s002.pdf [file ppat.1010755.s002.pdf]

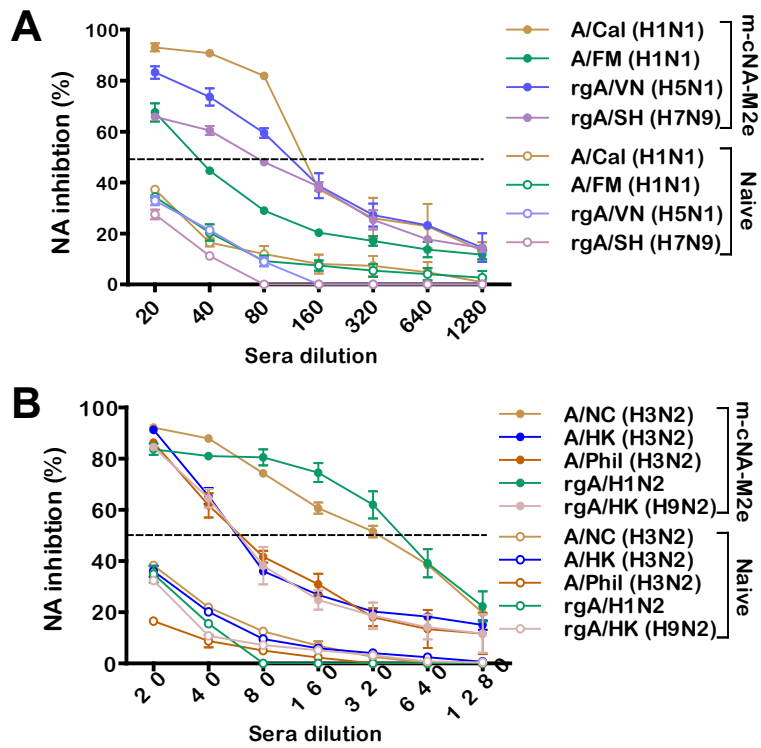

**S2 Figure. Neuraminidase (NA) inhibition activity in percentages by immune sera.** NA inhibition activities were measured from serially diluted boost immune and naïve sera by ELLA.
