# Supplementary material for: Universal protection against influenza viruses by multi-subtype neuraminidase and M2 ectodomain virus-like particle
Source: PubMed Central journal article supplement (PMC9409530; doi:10.1371/journal.ppat.1010755), 2022-08-25
Supplement: ppat.1010755.s003.pdf [file ppat.1010755.s003.pdf]

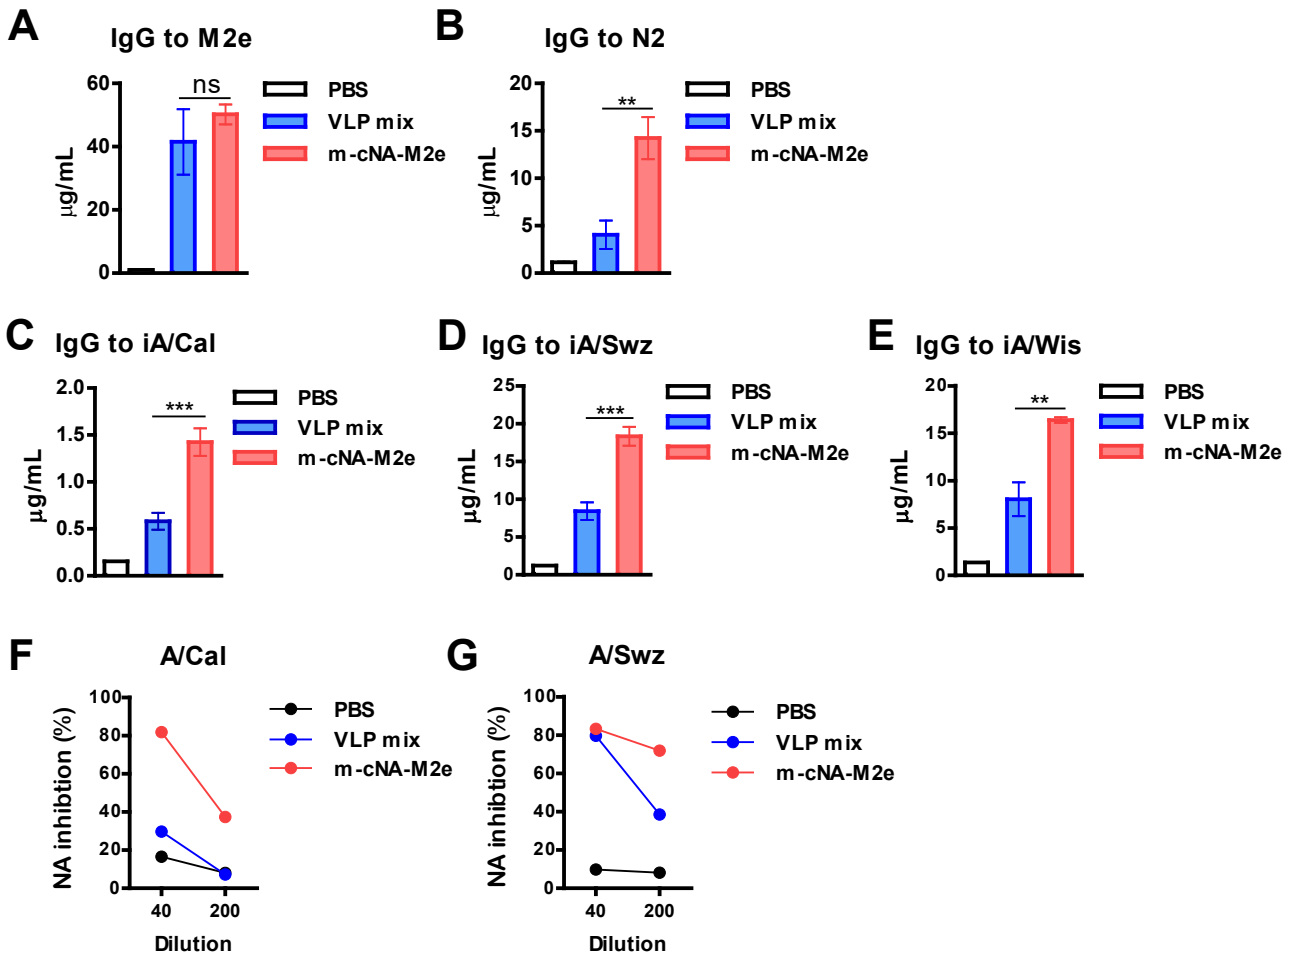

**S3 Figure. Comparison of humoral immune responses in boost antisera between m-cNA-M2e VLP and monomeric VLP mix in mice.** BALB/c mice (n=10 per group) were immunized twice with m-cNA-M2e VLP (10 µg) or VLP mix (12 µg of VLP mix: cN1 VLP 3µg +cN2 VLP 3µg +5xM2e VLP 3µg +B-NA VLP 3µg). Humoral immune responses were determined in boost antisera. Concentrations (µg/mL) of IgG antibodies specific for M2e (A) and N2 NA (B) as determined by ELISA. (C-E) Concentrations (µg/mL) of IgG antibodies specific for inactivated viruses as indicated: (C) IgG to inactivated A/California/2009 H1N1, (D) IgG to inactivated A/Switzerland/2013 H3N2, (E) IgG to inactivated A/Wisconsin/2009 H3N2. (F-G) NA inhibition (NAI) in percentages at 40X and 200X serum dilutions. (F) NAI to A/California/2009. (G) NAI to A/Switzerland/2013. Data represented as mean ± SEM; statistical significances were performed by one-way ANOVA with Tukey's multiple comparison test and indicated as \*\*,  $P < 0.01$ ; \*\*\*,  $P < 0.001$ ; ns, no significant difference between compared groups.
