# Supplementary material for: Universal protection against influenza viruses by multi-subtype neuraminidase and M2 ectodomain virus-like particle
Source: PubMed Central journal article supplement (PMC9409530; doi:10.1371/journal.ppat.1010755), 2022-08-25
Supplement: ppat.1010755.s004.pdf [file ppat.1010755.s004.pdf]

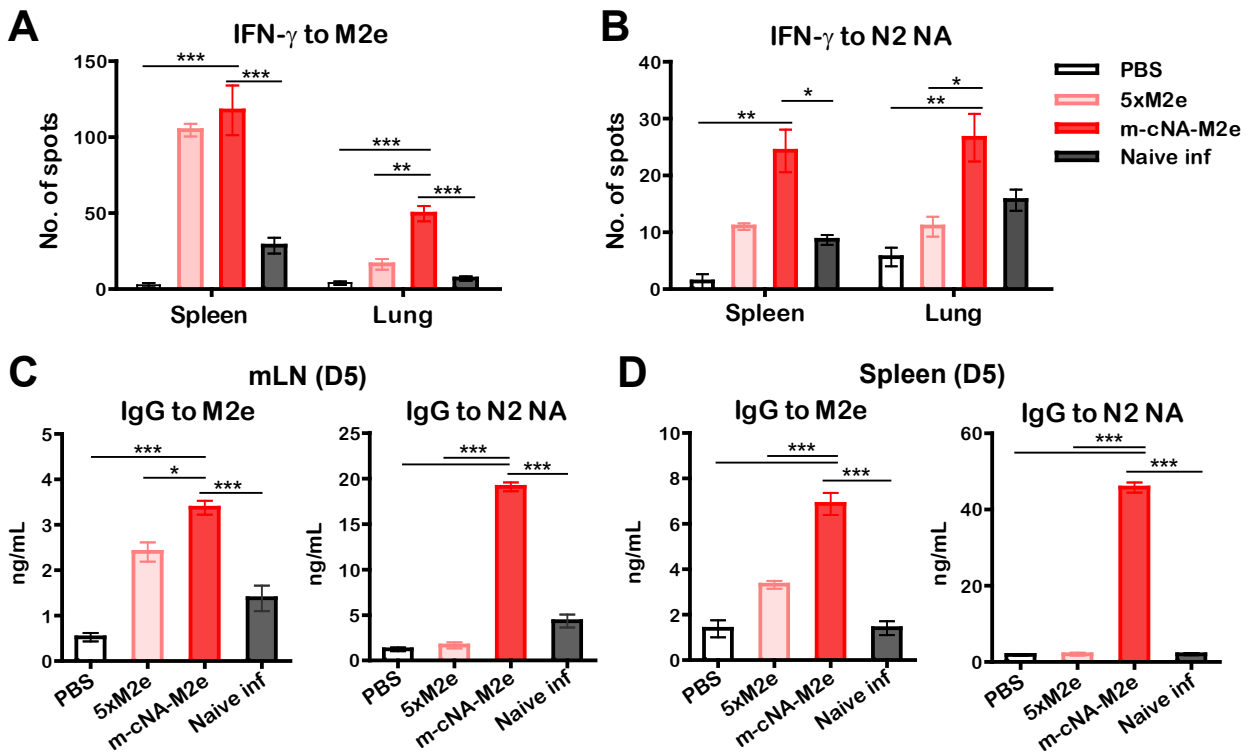

**S4 Figure. IFN- $\gamma$ -secreting cellular and IgG antibody secreting and humoral immune responses in mice with m-cNA-M2e VLP vaccination.** Immunized mice (n=4 per group, 6-8 weeks old adult mice) were infected with A/Phil/1982 (H3N2) virus. **(A and B)** IFN- $\gamma$ -secreting cell spots. Splenocytes and lung cells were cultured on the ELISpot plate pre-coated with cytokine capture antibody in the presence of 5  $\mu$ g/mL of (A) M2e or (B) N2 NA (A/Brisbane/10/2007 H3N2) peptide pools. **(C and D)** Antigen-specific IgG antibodies were determined from mediastinal lymph node (mLN) and spleen harvested on day 6 post infection and subsequent *in vitro* culture for 5 days (D5) on the plate precoated with 2  $\mu$ g/mL of (C) M2e peptide or 200 ng/mL of (D) N2 NA protein (A/Brisbane/10/2007 H3N2). The statistical significances were performed with one-way ANOVA with Tukey's Multiple Comparison test and indicated as \*,  $P < 0.05$ ; \*\*,  $P < 0.01$ ; \*\*\*,  $P < 0.001$  between indicated groups.
