# Supplementary material for: Universal protection against influenza viruses by multi-subtype neuraminidase and M2 ectodomain virus-like particle
Source: PubMed Central journal article supplement (PMC9409530; doi:10.1371/journal.ppat.1010755), 2022-08-25
Supplement: ppat.1010755.s006.pdf [file ppat.1010755.s006.pdf]

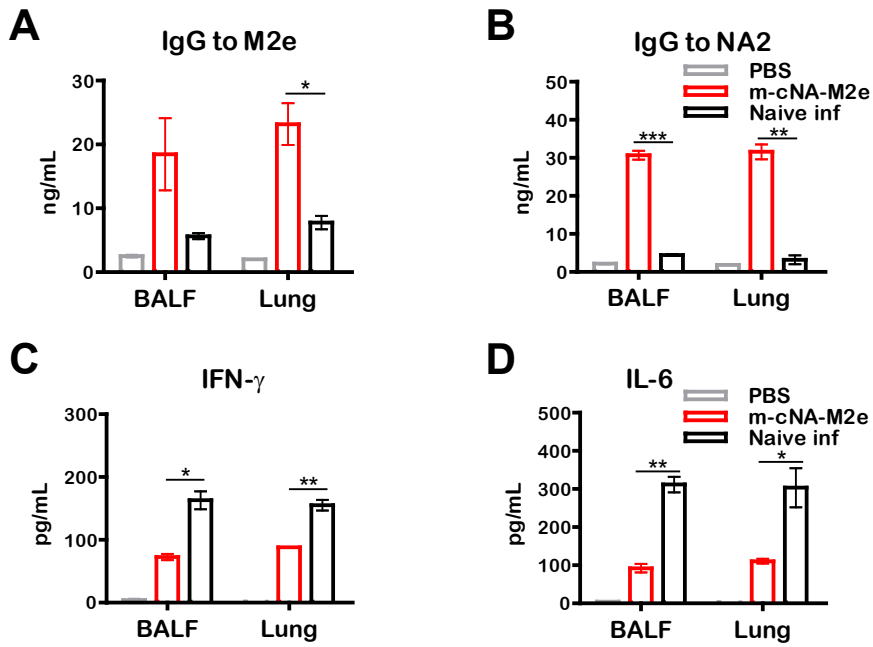

**S6 Figure. IgG antibody levels in respiratory mucosal sites and reduced lung inflammatory cytokines in aged mice with m-cNA-M2e vaccination upon influenza A virus infection.** Aged BALB/c mice (14-month-old,  $n=4$  per group) were vaccinated with m-cNA-M2e VLP. **(A and B)** IgG levels (ng/mL) specific for (A) M2e peptide or (B) NA2 protein (A/Brisbane/10/2007 H3N2) in BALF and lung lysates harvested on day 6 post infection with A/Phil H3N2 virus. **(C and D)** The levels of IFN- $\gamma$  and IL-6 in BALF and lung extracts by ELISA. Data represented as mean  $\pm$  SEM; statistical significances were performed by one-way ANOVA with Tukey's multiple comparison test and indicated as \*,  $P < 0.05$ ; \*\*,  $P < 0.01$ ; \*\*\*,  $P < 0.001$ ; ns, no significant difference between compared groups.
