# Supplementary material for: Universal protection against influenza viruses by multi-subtype neuraminidase and M2 ectodomain virus-like particle
Source: PubMed Central journal article supplement (PMC9409530; doi:10.1371/journal.ppat.1010755), 2022-08-25
Supplement: ppat.1010755.s007.pdf [file ppat.1010755.s007.pdf]

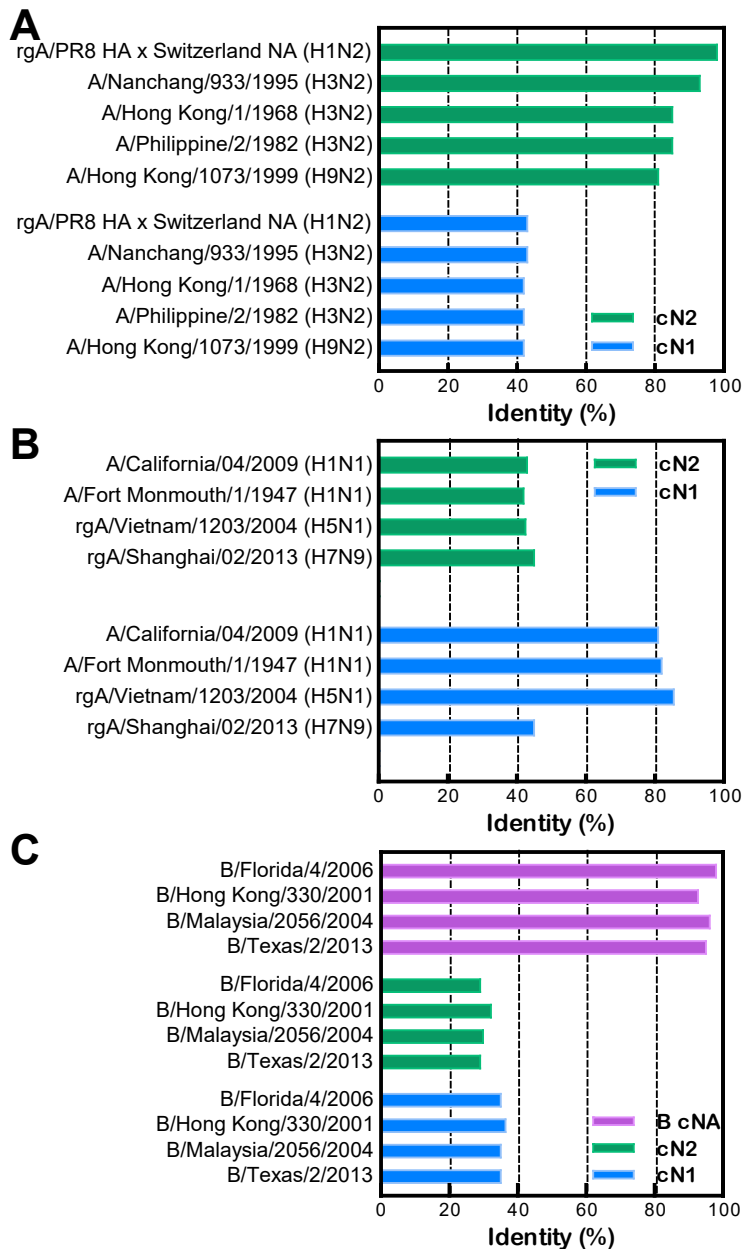

**S7 Figure. Sequence homology between the consensus NA vaccines and influenza viruses used for challenge.** The sequence similarity was identified using basic local alignment search tool (BLAST) with protein BLAST. **(A)** Sequence homology between the consensus N1 (cN1) and N2 (cN2) NA vaccines and influenza viruses containing N2 NA. **(B)** Sequence homology between the consensus N1 (cN1) and N2 (cN2) NA vaccines and influenza viruses containing N1 or N9 NA. **(C)** Sequence homology between the consensus influenza B NA (B cNA) vaccine and influenza B viruses. NA GenBank ID: AFG72628 for A/Nanchang (H3N2), ABQ97206 for A/Hong Kong/1/1968 (H3N2), AAO46474 for A/Philippine/1982 (H3N2), NP\_859038 for A/Hong Kong (H9N2), ADN89559 for A/California/2009 (H1N1), AAF77037 for A/Fort Monmouth/1947 (H1N1), AAT73329 for A/Vietnam/1203/2004 (H5N1), YP\_009118481 for A/Shanghai/02/2013 (H7N9), ACA33351 for B/Florida/4/2006, AAO38878 for B/Hong Kong/330/2001, ACO05961 for B/Malaysia/2056/2004.
